# Supplementary material for: Identification of Hydroxyproline-Containing Proteins and Hydroxylation of Proline Residues in Rice
Source: Front Plant Sci. 2020 Aug 7;11:1207. doi: 10.3389/fpls.2020.01207 (PMC7427127; doi:10.3389/fpls.2020.01207)
Supplement: Supplementary file 5 [file Table_2.xls]

## Sheet: Sheet1
Table S2 The 114 Hyps identified in the 62 HCPs of rice.
Accession	Modifications
A0A067Y2M1	Oxidation [P69; P79]
A0A0P0XT95	Oxidation [P436]
A0A0P0Y445	Oxidation [P160]
A3AYZ5	Oxidation [P53]
A3BCY2	Oxidation [P221]
A3BNI4	Oxidation [P45; P48]
A3BNI4	Oxidation [P45; P48; P99; P102; P169; P172]
A3C6D7	Oxidation [P166; P174; P309]
A3C6D7	Oxidation [P166; P174]
B9F4B5	Oxidation [P258]
B9F8H2	Oxidation [P497]
B9FRL0	Oxidation [P358; P362]
B9FUX8	Oxidation [P317; P320]
B9FZM7	Oxidation [P899]
C7J1V0	Oxidation [P96; P103]
P17784	Oxidation [P154]
P40392	Oxidation [P3]
Q06967	Oxidation [P116]
Q0J366	Oxidation [P240; P244]
Q0J3D9	Oxidation [P491]
Q0JQ62	Oxidation [P3]
Q10A30	Oxidation [P240]
Q10BJ7	Oxidation [P316; P317]
Q10KT9	Oxidation [P91]
Q10M12	Oxidation [P111; P114; P277; P280]
Q2QM69	Oxidation [P200; P202]
Q2R2W2	Oxidation [P3]
Q40638	Oxidation [P52]
Q53MQ1	Oxidation [P612]
Q5QLS1	Oxidation [P192; P196]
Q5VME5	Oxidation [P195; P197]
Q5VMI0	Oxidation [P257]
Q5WMR0	Oxidation [P167]
Q67G20	Oxidation [P166; P174; P309]
Q67G20	Oxidation [P166; P174]
Q67VX1	Oxidation [P1165]
Q69JW7	Oxidation [P256]
Q6F361	Oxidation [P41]
Q6H6C7	Oxidation [P292; P302]
Q6H6C7	Oxidation [P29]
Q6H7M1	Oxidation [P160; P163]
Q6I544	Oxidation [P103; P108; P109; P113]
Q6YW46	Oxidation [P197]
Q6Z2E1	Oxidation [P291; P294]
Q6Z2M1	Oxidation [P67; P235]
Q6Z3M0	Oxidation [P123; P124]
Q6Z7B0	Oxidation [P648]
Q6ZAA5	Oxidation [P76; P78]
Q6ZAX5	Oxidation [P99]
Q6ZBZ2	Oxidation [P74; P81]
Q75GI3	Oxidation [P348]
Q75I36	Oxidation [P95; P97]
Q7GDU7	Oxidation [P144; P145]
Q7XST8	Oxidation [P430]
Q84M59	Oxidation [P254; P256]
Q84MF1	Oxidation [P176; P178]
Q851A2	Oxidation [P219]
Q8H3S1	Oxidation [P343; P345; P347]
Q93X08	Oxidation [P190; P191]
Q94DL4	Oxidation [P166; P174; P309]
Q94DL4	Oxidation [P166; P174]
Q94LR4	Oxidation [P270; P275]
Q9ASE0	Oxidation [P112; P117; P118; P121]
Q9AUV6	Oxidation [P48; P52]
Q9LWS2	Oxidation [P91]
Q9XHW8	Oxidation [P93; P109; P114; P115; P119; P157]
V5K461	Oxidation [P166; P174]
Partial proteins contain multiple Hyps identified in multiple peptides.
