# Supplementary material for: Identification of Hydroxyproline-Containing Proteins and Hydroxylation of Proline Residues in Rice
Source: Front Plant Sci. 2020 Aug 7;11:1207. doi: 10.3389/fpls.2020.01207 (PMC7427127; doi:10.3389/fpls.2020.01207)
Supplement: Supplementary file 7 [file Table_4.xls]

## Sheet: Sheet1
Table S4 The adjacent aa sequences of hydroxyprolines from the 62 HCPs in rice.
Accession	Modifications	# Peptide Sequences
A0A067Y2M1	Oxidation [P69; P79]	[R].GOSIWDAFAHTOGNVAGNQNGDVATDQYHR.[Y]
A0A0P0XT95	Oxidation [P436]	[K].LGVGLESHFSTPNIOYMR.[S]
A0A0P0Y445	Oxidation [P160]	[R].QIVNIOSFMVR.[V]
A3AYZ5	Oxidation [P53]	[R].QSGTTOGYAYSTANK.[N]
A3BCY2	Oxidation [P221]	[R].YFWTmVNQONFK.[K]
A3BNI4	Oxidation [P45; P48; P99; P102; P169; P172]	[R].DSAVVLAOVNOKDEHQHWFK.[D] [K].ILOWGOEAHSSSPGAATAcTIGGVPVHTVR.[V] [K].LVOFNOEYEDASVLWTESKDVGK.[G]
A3C6D7	Oxidation [P166; P174; P309]	[R].TTGIVLDSGDGVSHTVOIYEGYALOHAILR.[L] [K].DLYGNVVLSGGTTmFOGIADR.[M]
B9F4B5	Oxidation [P258]	[R].YFWTmVNQONFK.[K]
B9F8H2	Oxidation [P497]	[K].KOTEGPQQMIQAVLNNATVETDNPDLR.[D]
B9FRL0	Oxidation [P358; P362]	[K].QITDGWLNGOYcSOAILHS.[-]
B9FUX8	Oxidation [P317; P320]	[R].LVOYNOEYLDESVLWTESK.[D]
B9FZM7	Oxidation [P899]	[R].AOILVATDVAAR.[G]
C7J1V0	Oxidation [P96; P103]	[K].VSAAAOTNAASAOR.[V]
P17784	Oxidation [P154]	[K].IGPNEOSQLAIDLNAQGLAR.[Y]
P40392	Acetyl [N-Term]; Oxidation [P3]	[-].MNOEYDYLFK.[L]
Q06967	Acetyl [N-Term]; Oxidation [P116]	[K].LLDSHLVOSATAAESK.[V]
Q0J366	Oxidation [P240; P244]	[R].NSGAFAWEIVOIEVOVGR.[G]
Q0J3D9	Oxidation [P491]	[R].LILGELQAOAVK.[Y]
Q0JQ62	Acetyl [N-Term]; Oxidation [P3]	[-].MNOEYDYLFK.[L]
Q10A30	Oxidation [P240]	[K].KVAOEVIAEYTVR.[T]
Q10BJ7	Oxidation [P316; P317]	[R].SLPWROOTNVFR.[V]
Q10KT9	Oxidation [P91]	[R].TGHYTPLOAGHSPLK.[R]
Q10M12	Oxidation [P111; P114; P277; P280]	[K].LAPFNOEYODESVLWTESGDVGK.[S] [K].LVOYNOGYQDESVLWTESR.[D]
Q2QM69	Oxidation [P200; P202]	[R].YVSAGSIEYWODOQR.[G]
Q2R2W2	Acetyl [N-Term]; Oxidation [P3]	[-].MSOAEPTREESVYK.[A]
Q40638	Oxidation [P52]	[K].ATWYGAOK.[G]
Q53MQ1	Oxidation [P612]	[R].MRADOATGYPGR.[S]
Q5QLS1	Oxidation [P192; P196]	[K].APAAAOTASTAKOK.[K]
Q5VME5	Oxidation [P195; P197]	[R].SWLOQOLLDLNK.[L]
Q5VMI0	Oxidation [P257]	[K].DOQANYmEWLDAQPAR.[S]
Q5WMR0	Oxidation [P167]	[R].LIELQSAOWSITDMPR.[F]
Q67G20	Oxidation [P166; P174; P309]	[R].TTGIVLDSGDGVSHTVOIYEGYALOHAILR.[L] [K].DLYGNVVLSGGTTmFOGIADR.[M]
Q67VX1	Oxidation [P1165]	[R].HLGKAEDOEVAR.[Q]
Q69JW7	Oxidation [P256]	[R].VAPVAGTPYDFLAGAOVGAR.[I]
Q6F361	Oxidation [P41]	[K].VAILGAAGGIGQOLALLmK.[L]
Q6H6C7	Oxidation [P29; P292; P302]	[R].ADLNVOLDDAQKITDDTR.[I] [K].TVAASAIODGWmGLDVGODAIK.[T]
Q6H7M1	Oxidation [P160; P163]	[R].GPQTOVNONWFQLPVGYHGR.[A]
Q6I544	Oxidation [P103; P108; P109; P113]	[R].IDYAOGGLNOOHTHOR.[A]
Q6YW46	Oxidation [P197]	[R].YFWTmVNQONFK.[K]
Q6Z2E1	Oxidation [P291; P294]	[R].GVDTYLGROWHODSR.[V]
Q6Z2M1	Oxidation [P67; P235]	[K].EAcGGAATDGHAOAAGAGAGAGAGAAVGAGAK.[A] [K].VAGAAEGAAGAAOK.[V]
Q6Z3M0	Oxidation [P123; P124]	[R].LWTIDDNOOPLPVNPAIK.[S]
Q6Z7B0	Oxidation [P648]	[R].TGGAOGGGADGEGGVDDEHDEL.[-]
Q6ZAA5	Oxidation [P76; P78]	[R].VTLGAGTDGALWOKOAVLVAEK.[L]
Q6ZAX5	Oxidation [P99]	[K].GGSTGGGSTGGTTGGASNVNSGOADTRPR.[K]
Q6ZBZ2	Oxidation [P74; P81]	[K].AAVTOAFVGQFOGVNGLGISAAR.[L]
Q75GI3	Oxidation [P348]	[R].TIQFVDWcOTGFK.[C]
Q75I36	Oxidation [P95; P97]	[R].FDOWOVFFR.[R]
Q7GDU7	Oxidation [P144; P145]	[R].YGGDDEDNLOOAVDWR.[E]
Q7XST8	Oxidation [P430]	[K].LEKDDTTGTSOADTAK.[S]
Q84M59	Oxidation [P254; P256]	[K].DATSOLOGWIIESLK.[A]
Q84MF1	Oxidation [P176; P178]	[R].AEGLADGTGVSOLOWAR.[W]
Q851A2	Oxidation [P219]	[R].DVSWAOVLGLAK.[F]
Q8H3S1	Oxidation [P343; P345; P347]	[K].VTEDLAOAOAOEGPK.[K]
Q93X08	Oxidation [P190; P191]	[K].DGWYOOGHGDVFPSLNNSGK.[L]
Q94DL4	Oxidation [P166; P174; P309]	[R].TTGIVLDSGDGVSHTVOIYEGYALOHAILR.[L] [K].DLYGNVVLSGGTTmFOGIADR.[M]
Q94LR4	Oxidation [P270; P275]	[K].TLVANNVIOANWRONTFYR.[S]
Q9ASE0	Oxidation [P112; P117; P118; P121]	[R].VFNGSGKOIDNGOOILOEAYLDISGSSINPSER.[T]
Q9AUV6	Oxidation [P48; P52]	[R].IDAWNSEQLOIYEOGLDEVVK.[E]
Q9LWS2	Oxidation [P91]	[K].NYVDMDEYOVTTELQNR.[C]
Q9XHW8	Oxidation [P93; P109; P114; P115; P119; P157]	[K].VOGLNTLGVSLAR.[I] [R].IDYAOGGLNOOHTHOR.[A] [R].TISQGDVFVFOR.[G]
V5K461	Oxidation [P166; P174]	[R].TTGIVLDSGDGVSHTVOIYEGYALOHAILR.[L]
The green sequences show glycomodules in peptides.
